# Supplementary material for: Bioaccumulation of 13C-fullerenol nanomaterials in wheat
Source: Royal Society of Chemistry journal article supplement (doi:10.1039/c5en00276a), 2016-01-01
Supplement: c5en00276a1.pdf [file c5en00276a1.pdf]

## Electronic supplementary information

### Details for the IRMS analysis and biodistribution of $^{13}\text{C}$ - $\text{C}_{60}$ -OH in wheat.

Specifically, the  $\delta$  value could be converted into  $^{13}\text{C}/^{12}\text{C}$  ratio ( $r$ ) following Equation 1.  $(^{13}\text{C}/^{12}\text{C})_{\text{standard}}$  was the  $^{13}\text{C}/^{12}\text{C}$  ratio of the VPDB sample (0.0111802). The  $r$  value was further converted into percentage of  $^{13}\text{C}$  in mass ( $\omega_{^{13}\text{C}}$ ) following Equation 2, which meant that the ratio of “total weight of  $^{13}\text{C}$  atoms/total weight of carbon atoms”. The mass of  $^{13}\text{C}$ -enriched fullerenols nanoparticles in tissue ( $m_{^{13}\text{C}-\text{fullerenol}}$ ) could be obtained from Equation 3, where  $\omega_{\text{carbon of tissue}}$  from IRMS was the mass percentage of carbon in the dry sample from exposed and unexposed plant (the value was constant for certain organ);  $m_{\text{tissue}}$  was the weight of tissues;  $m_{\text{dry}}/m_{\text{wet}}$  was the weight ratio of tissue before and after drying.  $\omega_{^{13}\text{C}}(\text{tissue})$  was the percentage of  $^{13}\text{C}$  in mass for tissue samples from exposed plant.  $\omega_{^{13}\text{C}}(\text{control})$  was the percentage of  $^{13}\text{C}$  in mass for tissue samples from unexposed plant. And  $\omega_{^{13}\text{C}-\text{fullerenol}}$  was the percentage of  $^{13}\text{C}$  in  $^{13}\text{C}$ -enriched fullerenol. The contents of  $^{13}\text{C}$ -enriched fullerenol in wheat roots, stems and leaves were expressed as %ID/g (Equation 4) or %ID (Equation 5), where dose was the mass of dissolved  $^{13}\text{C}$ -enriched fullerenols nanoparticles.

$$r = \left( \frac{\delta}{1000} + 1 \right) \times (^{13}\text{C} / ^{12}\text{C})_{\text{standard}} \quad (1)$$

$$\omega_{^{13}\text{C}} = \frac{r \times 13}{r \times 13 + 12} \times 100\% \quad (2)$$

$$m_{^{13}\text{C}\text{-fullerenol}} = \frac{[\omega_{^{13}\text{C}}(\text{tissue}) - \omega_{^{13}\text{C}}(\text{control})] \times (\omega_{\text{carbon of tissue}} \times m_{\text{tissue}} \times \frac{m_{\text{dry}}}{m_{\text{wet}}})}{\omega_{^{13}\text{C}\text{-fullerenol}}} \quad (3)$$

$$\%ID / g = \frac{m_{^{13}\text{C}\text{-fullerenol}}}{\text{dose}} \times 100\% \div m_{\text{tissue sample}} \quad (4)$$

$$\%ID = \frac{m_{^{13}\text{C}\text{-fullerenol}}}{\text{dose}} \times 100\% \quad (5)$$

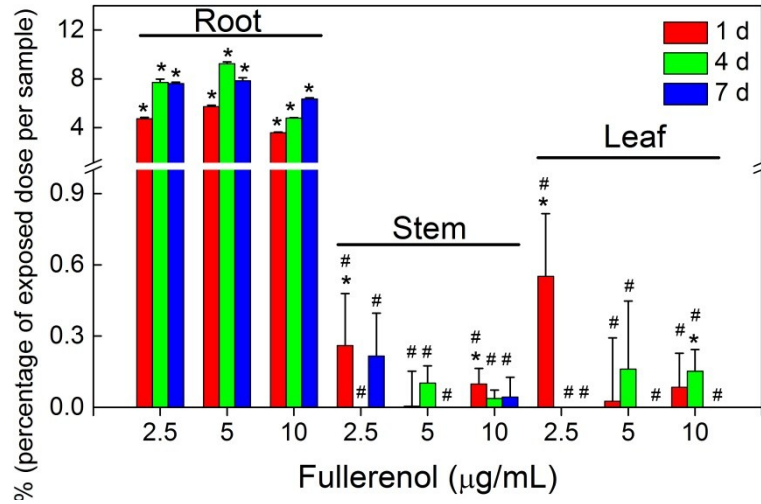

**Fig. S1** Bioaccumulation of  $^{13}\text{C}$ -fullerenol with the different concentrations in wheat during growth periods expressed by “%”. \*  $p < 0.05$  compared with control group; #  $p < 0.05$  compared with root samples exposed to the same  $^{13}\text{C}$ -fullerenol concentration.
